# Supplementary material
Source: PubMed Central journal article supplement (PMC3362910)
Supplement: peds.2011-3418_peds.2011-3418SupplementaryData.pdf [file peds.2011-3418_peds.2011-3418SupplementaryData.pdf]

## Supplemental Information

**SUPPLEMENTAL TABLE 3** Schema Describing Classification of Childhood Cancer Cases Estimated to Be In Utero Before Versus Those Estimated to Be In Utero After Mandatory Fortification of Enriched Grain Products With Folic Acid in the United States in 1996–1998

| Period            | Year of Birth | Year of Diagnosis |                   |                   |                   |                   |
|-------------------|---------------|-------------------|-------------------|-------------------|-------------------|-------------------|
|                   |               | Age 0 to <1 y     | 1 to <2 y         | 2 to <3 y         | 3 to <4 y         | 4 to <5 y         |
| Prefortification  | 1986          | 1986              | 1987              | 1988              | 1989              | 1990              |
|                   | 1987          | 1987              | 1988              | 1989              | 1990              | 1991              |
|                   | 1988          | 1988              | 1989              | 1990              | 1991              | 1992              |
|                   | 1989          | 1989              | 1990              | 1991              | 1992              | 1993              |
|                   | 1990          | 1990              | 1991              | 1992              | 1993              | 1994              |
|                   | 1991          | 1991              | 1992              | 1993              | 1994              | 1995              |
|                   | 1992          | 1992              | 1993              | 1994              | 1995              | 1996              |
|                   | 1993          | 1993              | 1994              | 1995              | 1996              | 1997              |
|                   | 1994          | 1994              | 1995              | 1996              | 1997              | 1998              |
|                   | 1995          | 1995              | 1996              | 1997              | 1998              | 1999              |
|                   | Excluded      | 1996              | 1996 <sup>a</sup> | 1997 <sup>a</sup> | 1998 <sup>a</sup> | 1999 <sup>a</sup> |
| 1997              |               | 1997 <sup>a</sup> | 1998 <sup>a</sup> | 1999 <sup>a</sup> | 2000 <sup>a</sup> | 2001 <sup>a</sup> |
| 1998              |               | 1998 <sup>a</sup> | 1999 <sup>a</sup> | 2000 <sup>a</sup> | 2001 <sup>a</sup> | 2002 <sup>a</sup> |
| Postfortification | 1999          | 1999              | 2000              | 2001              | 2002              | 2003              |
|                   | 2000          | 2000              | 2001              | 2002              | 2003              | 2004              |
|                   | 2001          | 2001              | 2002              | 2003              | 2004              | 2005              |
|                   | 2002          | 2002              | 2003              | 2004              | 2005              | 2006              |
|                   | 2003          | 2003              | 2004              | 2005              | 2006              | 2007              |
|                   | 2004          | 2004              | 2005              | 2006              | 2007              | 2008              |
|                   | 2005          | 2005              | 2006              | 2007              | 2008              | 2009 <sup>a</sup> |
|                   | 2006          | 2006              | 2007              | 2008              | 2009 <sup>a</sup> | 2010 <sup>a</sup> |
|                   | 2007          | 2007              | 2008              | 2009 <sup>a</sup> | 2010 <sup>a</sup> | 2011 <sup>a</sup> |
|                   | 2008          | 2008              | 2009 <sup>a</sup> | 2010 <sup>a</sup> | 2011 <sup>a</sup> | 2012 <sup>a</sup> |

<sup>a</sup> Indicates years that were excluded from analysis (for cases estimated to be in utero during the years the fortification mandate was being implemented) or not yet published by SEER (2009 and beyond).

**SUPPLEMENTAL TABLE 4** Pre- and Postfortification Frequencies and Incidence Rates, As Well As Incidence Rate Ratios Comparing the Periods, for Childhood Cancers Diagnosed in Infants Aged <1 Year in SEER 9 Catchment Areas

| Cancer                                                           | Prefortification <sup>a</sup> |                 |             | Postfortification <sup>b</sup> |                 |             | Post-vs Prefortification |                        |
|------------------------------------------------------------------|-------------------------------|-----------------|-------------|--------------------------------|-----------------|-------------|--------------------------|------------------------|
|                                                                  | Count                         | IR <sup>c</sup> | 95% CI      | Count                          | IR <sup>c</sup> | 95% CI      | IRR                      | 95% CI                 |
| All cancers                                                      | 894                           | 241.4           | 225.8–257.7 | 933                            | 238.1           | 223.1–253.9 | 0.99                     | 0.90–1.08              |
| I Leukemias; myeloproliferative and myelodysplastic diseases     | 136                           | 36.7            | 30.8–43.4   | 181                            | 46.2            | 39.7–53.4   | 1.26 <sup>d</sup>        | 1.00–1.58 <sup>d</sup> |
| I(a) Lymphoid leukemias                                          | 70                            | 18.9            | 14.7–23.9   | 82                             | 20.9            | 16.6–26.0   | 1.11                     | 0.80–1.55              |
| I(b) Acute myeloid leukemias                                     | 45                            | 12.1            | 8.9–16.3    | 72                             | 18.4            | 14.4–23.1   | 1.51 <sup>d</sup>        | 1.03–2.25 <sup>d</sup> |
| III CNS and miscellaneous intracranial and intraspinal neoplasms | 136                           | 36.7            | 30.8–43.4   | 111                            | 28.3            | 23.3–34.1   | 0.77 <sup>d</sup>        | 0.60–1.00 <sup>d</sup> |
| III(a.1) Ependymomas                                             | 18                            | 4.9             | 2.9–7.7     | 14                             | 3.6             | 2.0–6.0     | 0.74                     | 0.34–1.56              |
| III(b) Astrocytomas                                              | 52                            | 14.0            | 10.5–18.4   | 45                             | 11.5            | 8.4–15.4    | 0.82                     | 0.54–1.24              |
| III(c.1) Medulloblastomas                                        | 20                            | 5.4             | 3.3–8.3     | 15                             | 3.8             | 2.1–6.3     | 0.71                     | 0.34–1.46              |
| III(c.2) PNET                                                    | 22                            | 5.9             | 3.7–9.0     | 7                              | 1.8             | 0.7–3.7     | 0.30 <sup>d</sup>        | 0.11–0.73 <sup>d</sup> |
| IV(a) Neuroblastoma and ganglioneuroblastoma                     | 253                           | 68.3            | 60.1–77.3   | 256                            | 65.3            | 57.6–73.9   | 0.96                     | 0.80–1.14              |
| V Retinoblastoma                                                 | 110                           | 29.7            | 24.4–35.8   | 95                             | 24.2            | 19.6–29.6   | 0.82                     | 0.61–1.08              |
| VI(a.1) Nephroblastoma (Wilms tumor)                             | 67                            | 18.1            | 14.0–23.0   | 43                             | 11.0            | 7.9–14.8    | 0.61 <sup>d</sup>        | 0.40–0.90 <sup>d</sup> |
| VII(a) Hepatoblastoma                                            | 35                            | 9.4             | 6.6–13.1    | 34                             | 8.7             | 6.0–12.1    | 0.92                     | 0.56–1.52              |
| IX(a) Rhabdomyosarcomas                                          | 17                            | 4.6             | 2.7–7.3     | 22                             | 5.6             | 3.5–8.5     | 1.22                     | 0.62–2.45              |
| X Germ cell and trophoblastic tumors; neoplasms of gonads        | 62                            | 16.7            | 12.8–21.5   | 85                             | 21.7            | 17.3–26.8   | 1.30                     | 0.92–1.83              |
| Population                                                       | 3 703 871                     |                 |             | 3 918 070                      |                 |             |                          |                        |

<sup>a</sup> Includes infants diagnosed at <1 year in 1986–1995.

<sup>b</sup> Includes infants diagnosed at <1 year in 1999–2008.

<sup>c</sup> IRs are calculated per 1,000,000 person-years.

<sup>d</sup> Pre- and postfortification rates are statistically significantly different ( $P < .05$ ).
